# Supplementary material for: Methane in Soil Gas and Its Migration to the Atmosphere in the Dawanqi Oilfield, Tarim Basin, China
Source: Hindawi journal article supplement (doi:10.1155/2019/1693746), 2019-07-09
Supplement: f1 [file 1693746.f1.zip]

Archive with 3 entries (2 files):
- New folder (2)/
- New folder (2)/supplementary information 1.xlsx
- New folder (2)/supplementary information 2.xlsx
