# Supplementary material for: Methane in Soil Gas and Its Migration to the Atmosphere in the Dawanqi Oilfield, Tarim Basin, China
Source: Hindawi journal article supplement (doi:10.1155/2019/1693746), 2019-07-09
Supplement: f1 [file 1693746.f1.zip › New folder (2)/supplementary information 1.xlsx]

## Sheet: 壤中气
	sample	C1	C2	C3	IC4	NC4	IC5	NC5	C1/C2+	δ13CCH4	δ13CCO2	δD	湿度	C4	C5
断层区	18-7	1148.47	93.73	36.336	8.85	10.379	6.505	4.269	7.17486				0.122326	19.229	10.774
	19-4	2576.88	123.872	40.768	10.418	9.928	4.038	1.382	13.5336				0.068806	20.346	5.42
	541-14	824.659	81.072	19.946	5.406	5.989	6.349	4.073	6.71355				0.129642	11.395	10.422											0.0618551
	542-13	1300.29	84.043	20.281	5.038	5.706	2.605	1.544	10.9069	-11.3	-15.5	-162	0.083985	10.744	4.149
	545-12	1834.11	198.101	33.632	9.798	8.548	2.584	1.962	7.20317	-6.6	-19.3		0.121904	18.346	4.546
	547-11	468.622	27.833	11.294	2.812	3.567	1.684	1.231	9.67807				0.0936499	6.379	2.915
	556-10	160.234	12.152	5.055	1.164	1.412	0	0	8.09958				0.109895	2.576	0
	559-8	323.53	11.415	3.754	0.713	0.927	0	0	19.2474				0.049389	1.64	0
	554-15	2630.97	186.195	70.929	18.479	19.567	9.573	5.832	8.47127	-13.5	-17.2	-150	0.105582	38.046	15.405
	554-14	904.143	55.473	21.023	5.198	5.525	3.699	2.36	9.69299				0.0935192	10.723	6.059
	554-11	598.268	37.133	13.077	3.096	3.194	1.374	0	10.3374	-8.7	-20.1		0.0882035	6.29	1.374
	544-23	606.555	53.165	24.59	5.795	7.68	3.389	2.425	6.25031				0.137925	13.475	5.814
	546-20	1163.99	44.452	11.854	8	8.04	2.8	1.6	15.1668				0.0618551	16.04	4.4
	544-16	22.484	1.75	0.879	0	0	0	0	8.5523				0.104687	0	0
	543-28-1	501.11	24.614	8.883	1.97	2.22	0.8	0.6	12.8204				0.0723569	4.19	1.4
	543-28-2	1011.11	56.314	19	4.2	3.22	2.11	1.44	11.7184				0.0786263	7.42	3.55
	543-28-3	2228.04	122.584	32.5	7.534	8.567	4.22	2.814	12.5017				0.0740647	16.101	7.034
	543-28-4	967.11	68.614	16.283	3.97	3.72	1.98	1.68	10.0482				0.0905124	7.69	3.66
	543-28-5	988.11	55.614	14.883	3.97	3.22	1.66	0.67	12.3488				0.0749134	7.19	2.33
非断层	17-5	98.863	8.14	3.527	0.999	1.367	0	0	7.04504				0.1243	2.366	0
	543-13	2815.39	176.716	63.445	15.944	17.565	8.618	4.977	9.80067	-19	-16.4	-175	0.0925869	33.509	13.595
	545-13-1	221.576	14.281	5.253	1.31	1.51	0	0	9.91214				0.091641	2.82	0
	545-13-2	207.576	13.281	4.253	1.41	1.11	0	0	10.3509				0.0880991	2.52	0
	546-12	769.592	53.849	20.815	5.395	6.007	3.632	2.097	8.38381				0.106567	11.402	5.729
	549-11	224.303	15.138	5.563	1.419	1.372	0	0	9.54806				0.0948042	2.791	0
	550-10	1117.05	66.329	24.005	6.799	6.46	57.956	1.815	6.83781	-17.1	-17.1	-177	0.127587	13.259	59.771
	551-10	1863.84	108.98	37.738	9.611	10.044	5.028	3.289	10.6694	-15.1	-16.3	-152	0.0856941	19.655	8.317
	552-10	2614.07	155.845	51.206	12.815	12.452	6.259	3.495	10.7987	-14.9	-16.7	-189	0.0847548	25.267	9.754
	553-9	683.846	47.468	18.087	4.463	5.105	2.482	1.592	8.63475				0.103791	9.568	4.074
	554-9	317.269	14.654	4.869	1.026	1.054	0	0	14.6863				0.0637497	2.08	0
	557-9	1258.43	90.32	39.049	4.973	11.746	4.001	9.233	7.89865	-17.7	-16.3	-166	0.112377	16.719	13.234
	558-8	124.391	14.445	7.047	1.117	2.165	0	0	5.02103				0.166085	3.282	0
	559-7	65.364	2.815	1.367	0	0	0	0	15.6298				0.0601329	0	0
	546-13	3333.59	159.427	49.428	11.12	12.992	5.177	4.426	13.7428				0.0678297	24.112	9.603
	555-20	99.589	59.985	20.693	5.151	5	2.353	1.335	1.05366	-14.7	-16	-166	0.486935	10.151	3.688
	555-18	3716.41	179.092	56.393	14.66	14.799	7.404	4.101	13.4434				0.0692359	29.459	11.505
	555-16	311.404	27.223	9.241	2.404	2.622	1.29	0	7.2792				0.120785	5.026	1.29
	555-13	322.448	37.468	17.675	3.376	5.833	1.925	1.807	4.73603				0.174337	9.209	3.732
	553-10	896.1	48.25	16.979	4.132	4.063	2.474	1.809	11.5318				0.0797971	8.195	4.283
	553-7	75.555	5.145	2.337	0	0.54	0	0	9.41847				0.0959833	0.54	0
	542-26	619.975	43.79	9.653	2.514	2.618	1.268	0	10.36				0.088028	5.132	1.268
	543-25	159.183	18.675	6.793	1.837	2.162	1.444	0	5.14972				0.162609	3.999	1.444
	545-21	617.066	77.096	44.525	12.299	16.768	7.67	6.111	3.75187				0.210444	29.067	13.781
	545-20	876.42	88.905	42.097	8.759	14.118	5.697	7.873	5.23395				0.160412	22.877	13.57
	546-19	136.806	9.754	3.786	0.975	0.988	0	0	8.82449				0.101786	1.963	0
	544-18	447.494	126.627	69.679	6.999	3.236	5.831	10.769	2.00543				0.332731	10.235	16.6
	544-17	421.842	32.167	15.475	3.776	4.91	2.541	1.677	6.9673				0.125513	8.686	4.218
	543-16	382.983	39.851	11.995	3.099	3.769	2.043	1.186	6.18283				0.139221	6.868	3.229
	541-15	179.29	22.465	9.089	1.902	3.074	1.503	1.205	4.5693				0.179556	4.976	2.708
	542-12	408.163	38.265	17.609	3.801	5.746	2.418	1.795	5.86155				0.14574	9.547	4.213
	542-26-2	619.975	43.79	9.653	2.514	2.618	1.268	0	10.36				0.088028	5.132	1.268
	MEAN	907.148	62.3208	21.6528	5.15706	5.78867	3.83631	2.04851	9.14029	-13.86	-17.09	-167.125	0.117509	10.9457	5.88482
		906.337	53.117	18.4524	4.36202	4.88978	8.12615	2.46698	3.55523	3.95817	1.47381	13.0322	0.0704795	9.13237	9.02531

## Sheet: 热释烃
	sample	C1	C2	C3	iC4	nC4	iC5	nC5	C1/C2+	湿度	C4	C5
断层区	18-7	22.061	0.355	0.824	0.258	0.239	0.314	0.306	9.60845	0.0942645	0.497	0.62
	19-4	2.903	0.378	0.095	0.014	0.022	0.006	0.008	5.55067	0.152656	0.036	0.014
	541-14	5.375	0.458	0.404	0.057	0.134	0.026	0.051	4.75664	0.173713	0.191	0.077
	542-13	2.913	0.478	0.095	0.014	0.022	0.006	0.008	4.67576	0.176188	0.036	0.014
	545-12	5.054	0.63	0.255	0.041	0.085	0.018	0.032	4.76343	0.173508	0.126	0.05
	547-11	7.027	0.423	0.757	0.217	0.266	0.098	0.1	3.77593	0.209383	0.483	0.198
	556-10	3.483	0.188	0.133	0.023	0.037	0.011	0.014	8.57882	0.104397	0.06	0.025
	559-8	3.706	0.56	0.271	0.052	0.06	0.023	0.023	3.74722	0.21065	0.112	0.046
	554-15	2.333	0.251	0.143	0.047	0.049	0.021	0.019	4.40189	0.185121	0.096	0.04
	554-14	5.565	3.625	0.205	0.047	0.07	0.021	0.026	1.39334	0.417826	0.117	0.047
	554-11	8.823	9.569	0.298	0.029	0.047	0.013	0.018	0.8846	0.530617	0.076	0.031
	544-23	3.197	0.558	0.171	0.066	0.085	0.03	0.032	3.39384	0.227591	0.151	0.062
	546-20	6.271	7.536	0.254	0.054	0.065	0.024	0.024	0.788111	0.559249	0.119	0.048
	544-16	3.283	1.842	0.096	0.025	0.039	0.011	0.015	1.61884	0.381849	0.064	0.026
	543-28-1	15.87	0.801	0.864	0.38	0.323	0.259	0.162	5.69021	0.149472	0.703	0.421
	543-28-2	4.534	0.319	0.2	0.052	0.09	0.023	0.034	6.31476	0.13671	0.142	0.057
	543-28-3	4.62	0.319	0.2	0.052	0.09	0.023	0.034	6.43454	0.134507	0.142	0.057
	543-28-4	2.714	0.289	0.109	0.036	0.043	0.016	0.016	5.33202	0.157927	0.079	0.032
	543-28-5	1.912	0.311	0.2	0.057	0.031	0.026	0.012	3.00157	0.249902	0.088	0.038
非断层	17-5	6.261	3.811	0.244	0.024	0.05	0.011	0.019	1.50541	0.399136	0.074	0.03
	543-13	3.1	0.253	0.247	0.052	0.062	0.023	0.024	4.68986	0.175751	0.114	0.047
	545-13-1	5.177	2.268	0.316	0.076	0.108	0.034	0.041	1.82096	0.354489	0.184	0.075
	545-13-2	2.301	0.223	0.097	0.037	0.044	0.017	0.016	5.30184	0.158684	0.081	0.033
	546-12	2.223	0.378	0.095	0.014	0.022	0.006	0.008	4.25048	0.190459	0.036	0.014
	549-11	2.813	0.378	0.095	0.014	0.022	0.006	0.008	5.37859	0.156775	0.036	0.014
	550-10	2.818	0.352	0.136	0.048	0.078	0.022	0.03	4.23123	0.19116	0.126	0.052
	551-10	3.739	0.229	0.156	0.059	0.054	0.027	0.02	6.86055	0.127218	0.113	0.047
	552-10	3.56	0.518	0.18	0.04	0.051	0.018	0.019	4.30993	0.188326	0.091	0.037
	553-9	3.686	0.539	0.315	0.087	0.096	0.039	0.036	3.31475	0.231763	0.183	0.075
	554-9	3.028	0.126	0.146	0.042	0.054	0.019	0.021	7.42157	0.118743	0.096	0.04
	557-9	2.516	0.338	0.181	0.04	0.052	0.018	0.02	3.87673	0.205055	0.092	0.038
	558-8	3.139	1.3	0.097	0.033	0.058	0.015	0.022	2.05836	0.326973	0.091	0.037
	559-7	3.686	0.539	0.315	0.087	0.096	0.039	0.036	3.31475	0.231763	0.183	0.075
	546-13	2.985	0.447	0.134	0.027	0.055	0.012	0.021	4.28879	0.189079	0.082	0.033
	555-20	8.015	10.752	0.308	0.092	0.108	0.042	0.041	0.706603	0.585959	0.2	0.083
	555-18	3.899	0.178	0.155	0.015	0.037	0.007	0.014	9.60345	0.0943089	0.052	0.021
	555-16	3.584	1.8	0.2	0.057	0.064	0.026	0.024	1.65085	0.377237	0.121	0.05
	555-13	2.574	0.621	0.519	0.093	0.072	0.042	0.027	1.87336	0.348024	0.165	0.069
	553-10	5.56	3.113	0.309	0.077	0.063	0.035	0.024	1.53549	0.394401	0.14	0.059
	553-7	4.941	1.556	0.218	0.032	0.046	0.014	0.017	2.624	0.275938	0.078	0.031
	542-26	8.743	1.23	0.443	0.075	0.093	0.034	0.035	4.57749	0.179292	0.168	0.069
	543-25	4.134	2.478	0.216	0.028	0.047	0.012	0.018	1.47696	0.403721	0.075	0.03
	545-21	6.44	2.7	0.296	0.111	0.123	0.05	0.047	1.93568	0.340637	0.234	0.097
	545-20	3.742	0.425	0.253	0.181	0.11	0.081	0.041	3.42988	0.22574	0.291	0.122
	546-19	9.353	2.857	0.74	0.22	0.343	0.099	0.129	2.13149	0.319336	0.563	0.228
	544-18	8.316	10.519	0.183	0.063	0.126	0.028	0.048	0.758275	0.568739	0.189	0.076
	544-17	3.91	0.689	0.323	0.07	0.147	0.031	0.055	2.97338	0.251675	0.217	0.086
	543-16	6.925	4.347	0.384	0.133	0.164	0.06	0.062	1.34466	0.426501	0.297	0.122
	541-15	5.998	1.703	0.479	0.048	0.088	0.022	0.033	2.5276	0.283479	0.136	0.055
	542-12	15.794	4.2	1.957	0.234	0.442	0.105	0.167	2.22294	0.310276	0.676	0.272
	542-26-2	2.496	0.709	0.096	0.03	0.052	0.013	0.02	2.71304	0.269321	0.082	0.033
	MEAN	5.23725	1.77384	0.302098	0.0737255	0.0945882	0.0387451	0.0407255	3.75333	0.261284	0.168314	0.0794706
	STV	3.79036	2.5934	0.301257	0.0725231	0.0855339	0.0558103	0.0508661	2.20887	0.127581	0.153404	0.105
