# Supplementary material for: Methane in Soil Gas and Its Migration to the Atmosphere in the Dawanqi Oilfield, Tarim Basin, China
Source: Hindawi journal article supplement (doi:10.1155/2019/1693746), 2019-07-09
Supplement: f1 [file 1693746.f1.zip › New folder (2)/supplementary information 2.xlsx]

## Sheet: Sheet1
	壤中气
	Y	X	CH4	C2H6	C3H8	C3H6	IC4	NC4	C4
B-1	1.45699e+07	4.63545e+06	2.255	0.001	0	0	0	0	0
B-2	1.45699e+07	4.63545e+06	2.132	0	0	0	0	0	0
B-3	1.45699e+07	4.63545e+06	2.034	0	0	0	0	0	0
B-4	1.45699e+07	4.63545e+06	1.978	0	0	0	0	0	0
平均值			2.09975	0.00025	0	0	0	0	0
	吸附烃
B-1	Y	X	CH4	C2H6	C3H8	C3H6	IC4	NC4	C4
B-2	1.45699e+07	4.63545e+06	3.426	0.213	0.124	0.002	0	0	0
B-3	1.45699e+07	4.63545e+06	3.322	0.253	0.096	0	0	0	0
B-4	1.45699e+07	4.63545e+06	2.985	0.19	0.102	0.001	0	0	0
	1.45699e+07	4.63545e+06	3.078	0.21	0.096	0	0	0	0
平均值			3.20275	0.2165	0.1045	0.00075	0	0	0
